# Supplementary material
Source: PubMed Central journal article supplement (PMC3646576)
Supplement: NIHMS430886-supplement-01.pdf [file NIHMS430886-supplement-01.pdf]

Supporting information

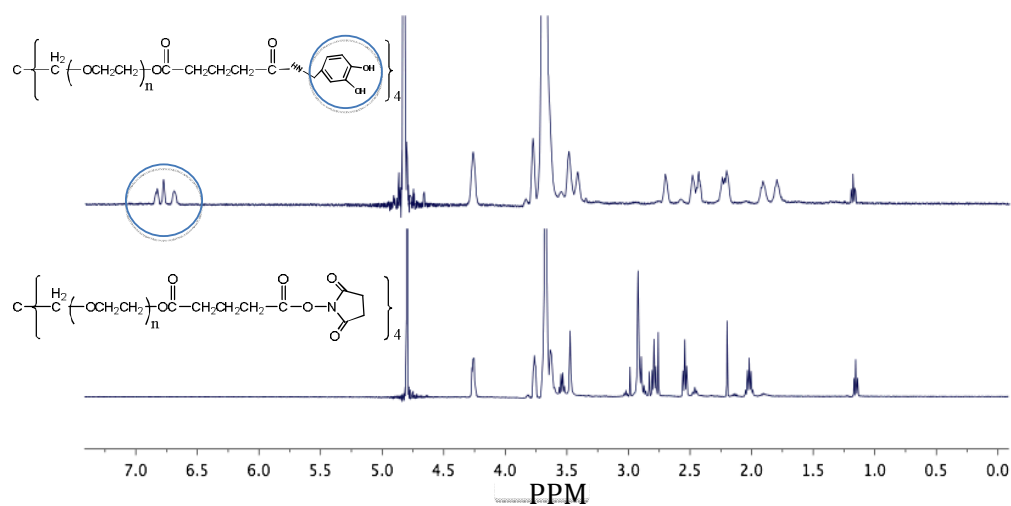

**Figure S1.** <sup>1</sup>H NMR spectra (in D<sub>2</sub>O) of product of reaction (upper panel) between four-armed PEG (lower panel) and dopamine hydrochloride. The presence of new peaks between 6.6-6.8 ppm (circled in tracing) for the protons of the phenol ring (circled in structure) documented the successful synthesis of PEG<sub>4</sub>-dopamine.

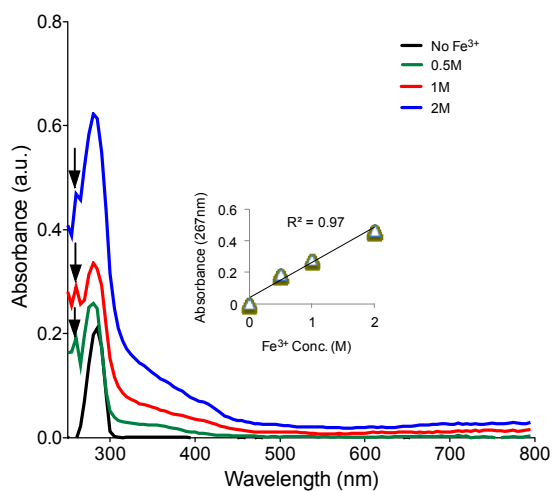

**Figure S2:** UV/Vis spectra for the oxidation of 5 mg PEG<sub>4</sub>-dopamine with 1.5  $\mu$ L of various Fe<sup>3+</sup> concentrations after 30 min, and an inset plot showing the correlation between the absorption peak at 267 nm (shown by arrows) and Fe<sup>3+</sup> concentration. The peaks at 267 are attributable to the covalent dopamine-dopamine conjugate 5,5'-di(3,4-dihydroxyphenylalanine).
